# Supplementary material for: Membrane-bound β-catenin degradation is enhanced by ETS2-mediated Siah1 induction in Helicobacter pylori-infected gastric cancer cells
Source: PubMed Central journal article supplement (PMC5523059; doi:10.1038/oncsis.2017.26), 2017-05-08
Supplement: oncsis201726x1.pdf [file oncsis201726x1.pdf]

## Supplementary data

### Membrane-bound $\beta$ -catenin degradation is enhanced by ETS2-mediated Siah1 induction in *Helicobacter pylori*-infected gastric cancer cells

L Das<sup>1,5</sup>, SB Kokate<sup>1,5</sup>, P Dixit<sup>1</sup>, S Rath<sup>1</sup>, N Rout<sup>2</sup>, SP Singh<sup>3</sup>, SE Crowe<sup>4</sup>, A Bhattacharyya<sup>1</sup>

**Affiliations:** <sup>1</sup>School of Biological Sciences, National Institute of Science Education and Research (NISER) Bhubaneswar, HBNI, P.O. Bhipur-Padanpur, Via Jatni, Dist. Khurda 752050, Odisha, India. <sup>2</sup>Department of Oncopathology, Acharya Harihar Regional Cancer Centre, Cuttack 753007, Odisha, India. <sup>3</sup>Department of Gastroenterology, SCB Medical College, Cuttack 753007, Odisha, India. <sup>4</sup>School of Medicine, Division of Gastroenterology, UC San Diego, California 92093, USA

<sup>5</sup>contributed equally

**Correspondence:** School of Biological Sciences, National Institute of Science Education and Research (NISER) Bhubaneswar, HBNI, P.O. Bhipur-Padanpur, Via Jatni, Dist. Khurda 752050, Odisha, India. Tel: +91-674-2494210, e-mail: asima@niser.ac.in

### *siah1* primers

***siah1* forward:** 5' AAAAGCTTCAAATGAGCCGTCAGACTGCTACAGCATT 3'

***siah1* reverse:** 5' CCTCGAGTCAACACATGGAAATAGTTACATTGATG 3'

### *siah1* 5' UTR primers

**WT forward:** 5' AAGGTACCAGCAACGGTAGC 3'

**WT reverse:** 5' ATTAAGCTTTGTGGCGGAGAG 3'

**EBS mutant:** 5' GTCGGTCTCGGCGCCATTAAGAGGCGGTGGCGC 3'

### *siah1* 5' UTR EBS oligos for *in vitro* binding assay

**5' biotinylated WT forward:** 5' TCTCGGCGCCGGAAGAGGCGGTGGCG 3'

**5' biotinylated WT reverse:** 5' CGCCACCGCCTCTTCCCGGCGCCGAGA 3'

**5' biotinylated mutant forward:** 5' TCTCGGCGCCATTAAGAGGCGGTGGCG 3'

**5' biotinylated mutant reverse:** 5' CGCCACCGCCTCTTAATGGCGCCGAGA 3'

### Primers for ChIP assay

**Forward (Specific):** 5' CGCAGTGTGTGGTATTTAGCG 3'

**Reverse (Specific):** 5' TCCTGGCACCAACGCG 3'

**Forward (Non Specific):** 5' AACACTAGCCACTACTTGAGGTTTA 3'

**Reverse (Non Specific):** 5' GCAGCTTTTGATGGTGGCTTTAC 3'

**Supplementary Figure 1.** List of primers and oligonucleotides used in the study. Underlined is the EBS. Mutations are shown in boldfaced italics.

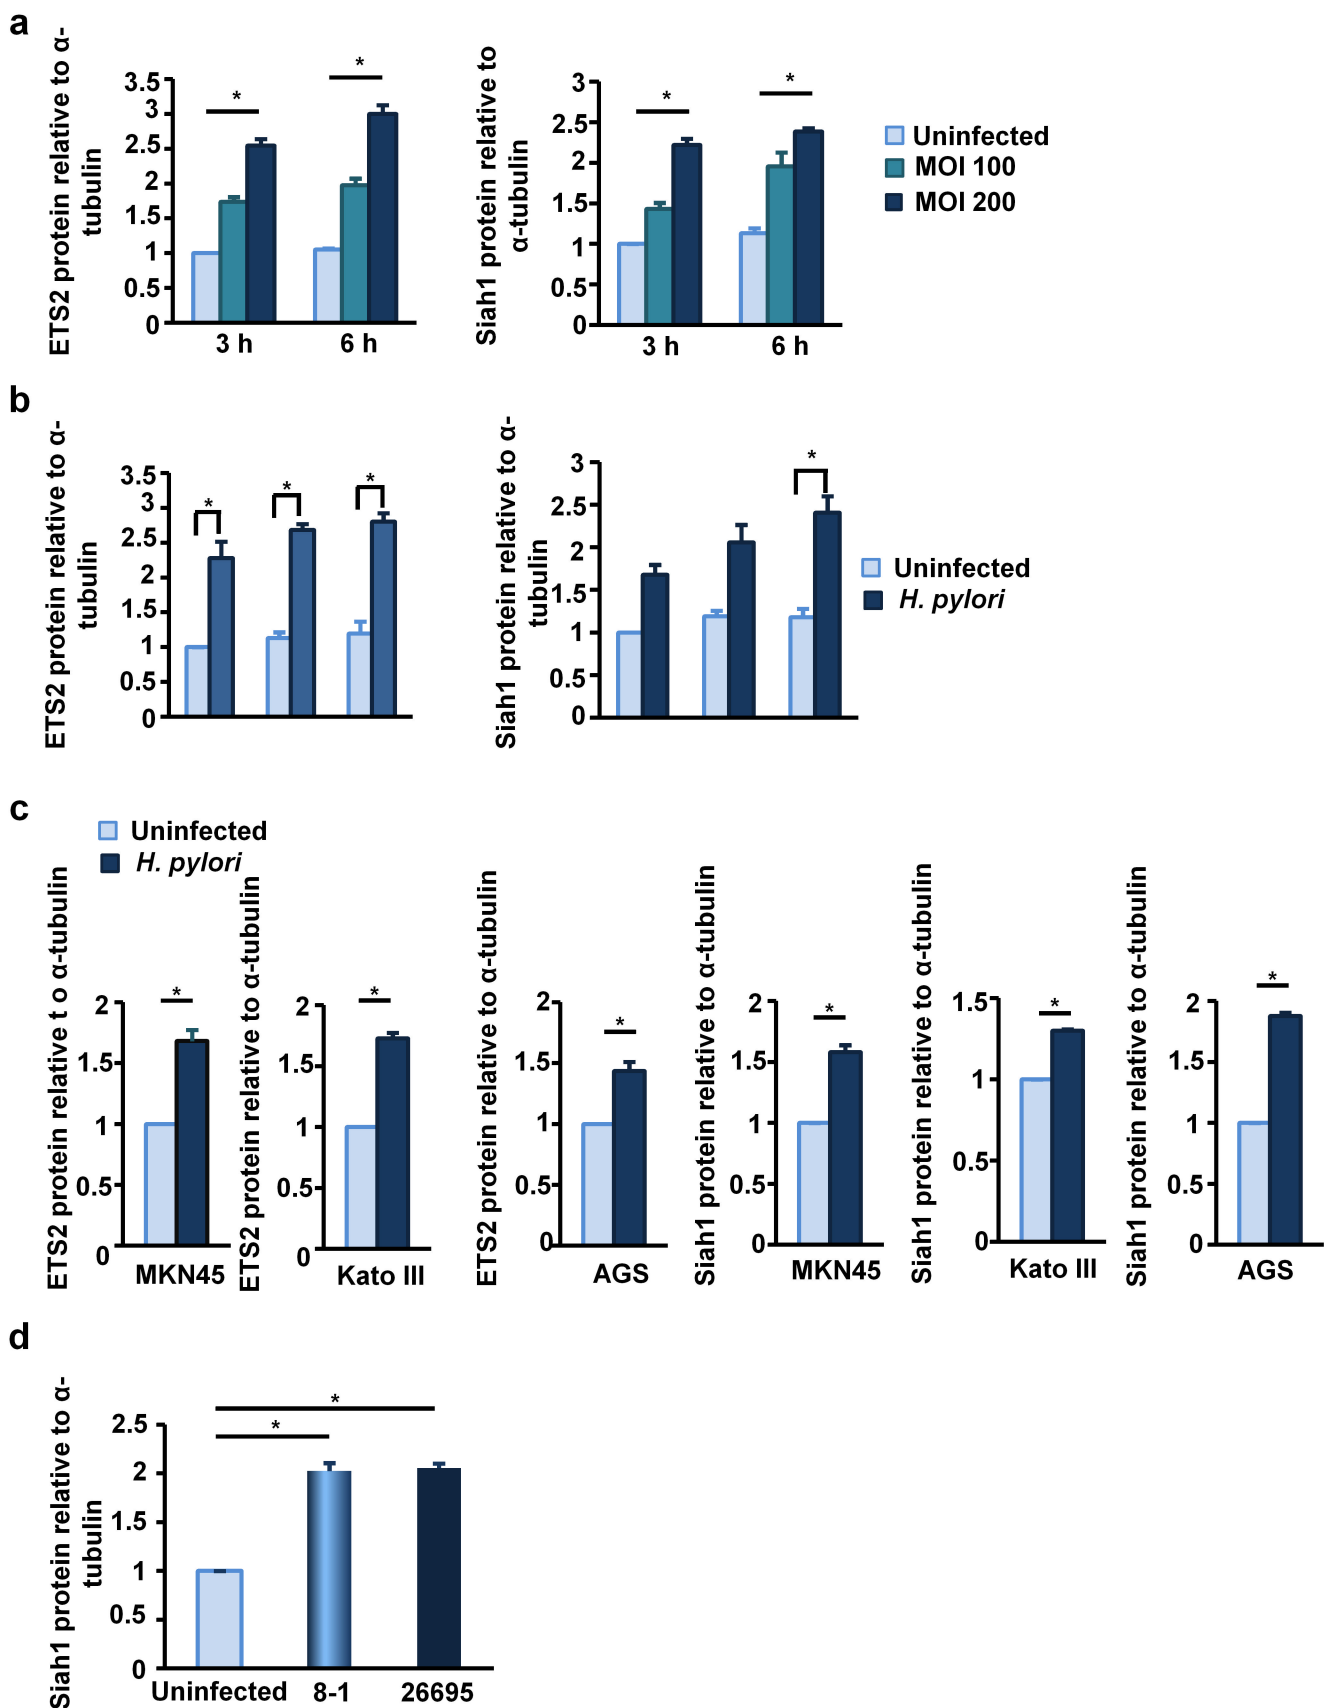

**Supplementary Figure 2.** Induced ETS2 and Siah1 expression in *H. pylori*-infected GGCs. Graphical representations of Fig. 3a-3d (mean  $\pm$  SEM, n=3) \* $P < 0.05$ .

Protein level relative to loading control (Expressed as Protein/loading control)

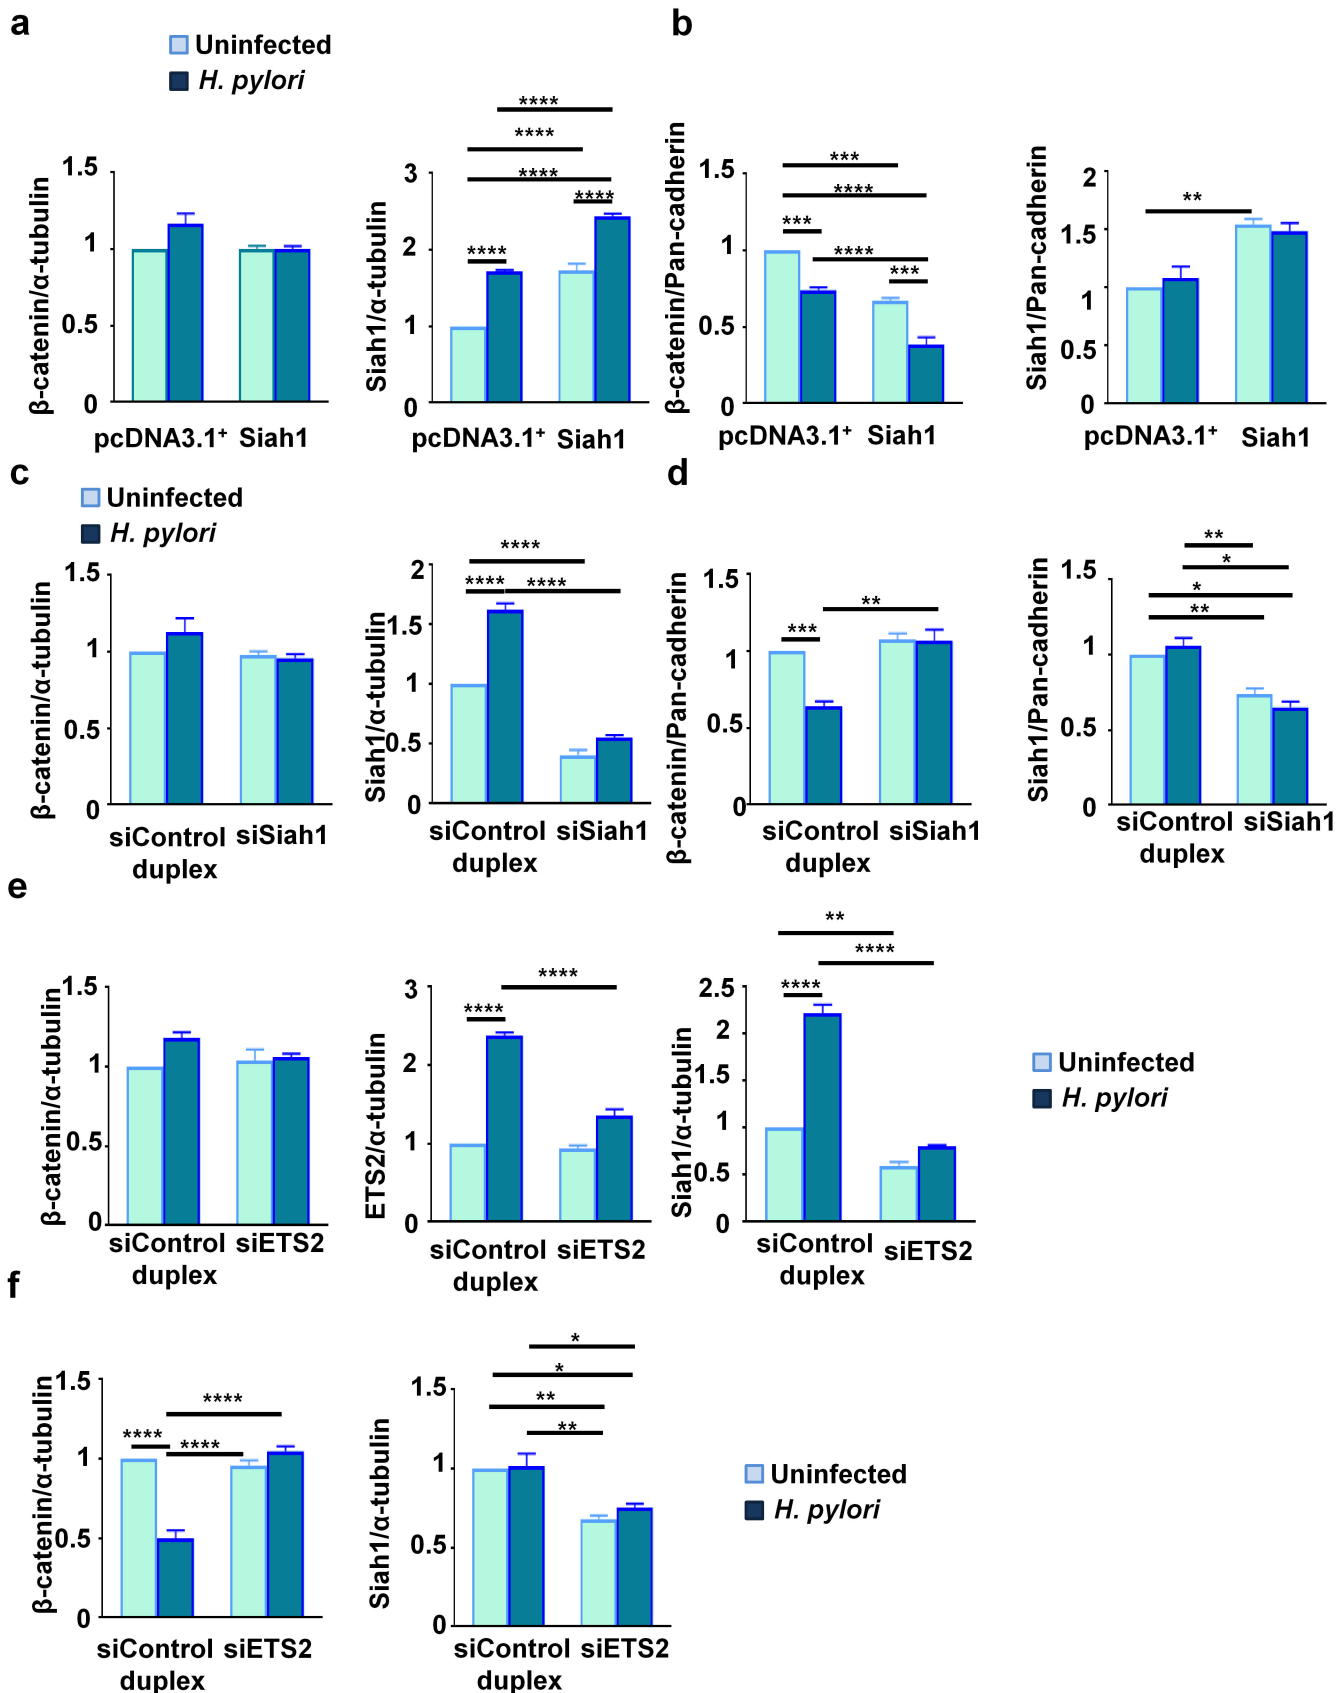

**Supplementary Figure 3.** Increased membrane-bound β-catenin degradation in *H. pylori*-infected GCCs is mediated by Siah1. Graphical representations of Fig. 6a-f (n=3). Data are analyzed by 2-way ANOVA with Tukey's post hoc test. Error bars, SEM. \**P* < 0.05; \*\**P* < 0.01; \*\*\**P* < 0.003; \*\*\*\**P* < 0.0001.

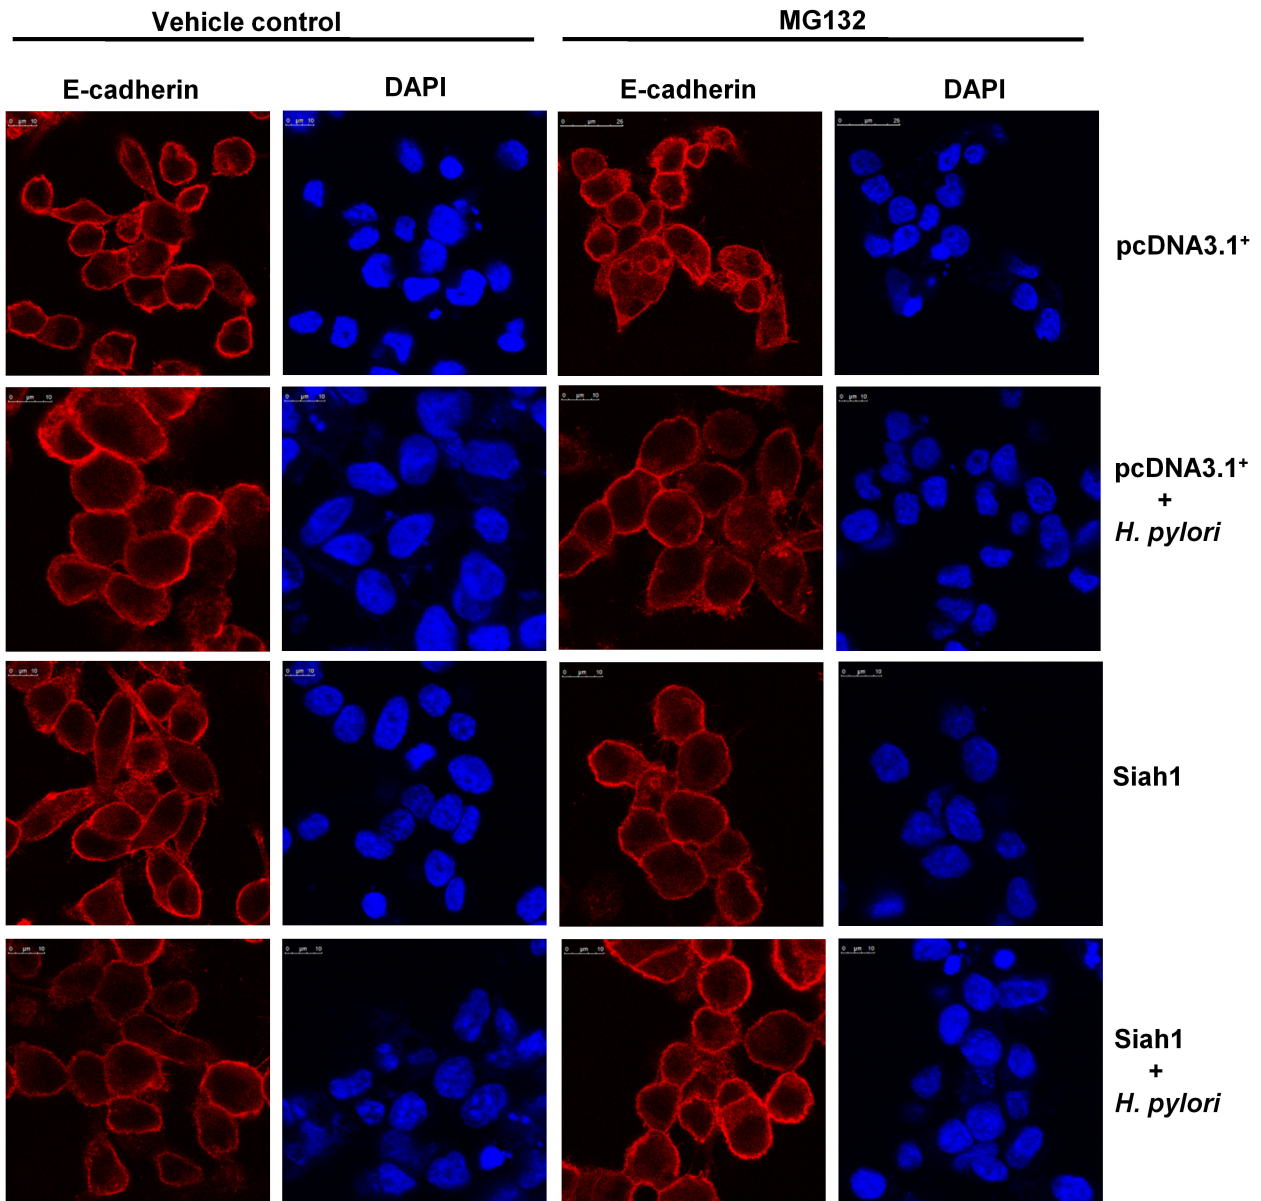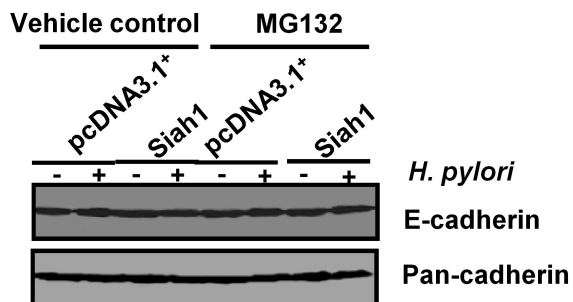

**Supplementary Figure 4.** The status of Membrane bound E-cadherin in *H. pylori* infected GCCs. A representative confocal microscopy result (n=4) showing E-cadherin expression in *H. pylori*-infected MKN45 cells. Accompanying western blot result showing level of E-cadherin in the above experiment.
